# Supplementary material
Source: Research Square preprint supplement (doi:10.21203/rs.3.rs-8633232/v1)
Supplement: Supplementary file 1 [file 0684a88f68db860285b7a800.pdf]

## **SUPPLEMENTARY MATERIAL**

### **Section 2.5. Procedure for computing signal coupling**

The procedure we applied to compute Cortical Functional Coherence (CFC) is based on the method presented in Bigot et al. (2011). Here, we present a step-by-step explanation with an example between two signals.

- 1.** Select two signals: EEG-channel (C3 electrode) and EEG-channel (FC2 electrode).
- 2.** Select trials to include: trials within the range of the subject-level mean time  $\pm 2$  SD.
- 3.** Apply Continuous Wavelet transform of both segmented signals, for each repetition. In this step, WavCrossSpect toolbox by Bigot et al (2011) was used with the parameters: 'Mother'=Morlet, 'nvoice'=5, 'J1'=100, 'wavenumber'=6, 'MaxScale'=default). This step provides an Auto-Spectrum (scalogram or time-frequency map) for every signal segment, for both EEG signals.
- 4.** Compute 'Cross-Spectrum' between signals pair, for each repetition separately. This is a cross correlation between the two auto-spectrums obtained on step 3.
- 5.** Compute 'Mean Auto-Spectrum' for each signal separately (Fig S1 A and B), which is calculated as the point-by-point mean from the all power auto-spectrums of repetitions selected on step 3.
- 6.** Compute 'Mean Cross-Spectrum' using 'Cross-Spectrum' from each signals pair (Fig S1 C), which is calculated as the point-by-point mean from every cross-spectrums computed on step 4.

**7.** Determine 'Significant Cross-Spectrum' (Fig S1 E), which is the points from 'Mean Cross-Spectrum' map that are above the threshold  $\lambda_\alpha$  obtained with Equation S1, at level  $\alpha = 0.05$ , explained in detail by Bigot et al (2011).

$$\lambda_\alpha = \frac{\rho_x \rho_y}{n} \left( -\log(\alpha/2) + \sqrt{-2n \log(\alpha/2)} \right), \quad (\text{Eq. S1})$$

where  $\rho_x$  and  $\rho_y$  are the largest eigenvalues of the empirical covariance matrices of both signals; and  $n$  is the number of repetitions.

**8.** Compute 'Magnitude-Squared Coherence'  $R_{xy}^2(\omega, u)$ , which is a normalized value from 0 to 1 (Fig S1 D), with Equation S2.

$$R_{xy}^2(\omega, u) = \frac{|S_{xy}(\omega, u)|^2}{S_x(\omega, u) S_y(\omega, u)}, \quad (\text{Eq. S2})$$

where  $S_{xy}(\omega, u)$  is the 'Mean Cross-Spectrum';  $S_x(\omega, u)$  and  $S_y(\omega, u)$  are the 'Mean Auto-Spectrums' of both signals.

**9.** Apply 'Significant Cross-Spectrum' matrix as a mask over 'Magnitude-Squared Coherence' to obtain normalized coherence only where the 'Mean cross-spectrum' was significant (Fig S1 F).

**10.** Boundary selection for the windows of interest within the time-frequency map depending of frequency and time interval. We decided to analyze the beta band (15 to 30 Hz). The window of interest are marked with red dashed lines in Fig S1 G.

**11.** Compute CFC as the single value (mean) of all values within the window of interest.

**12.** The same procedure was performed between every pair of EEG channels.

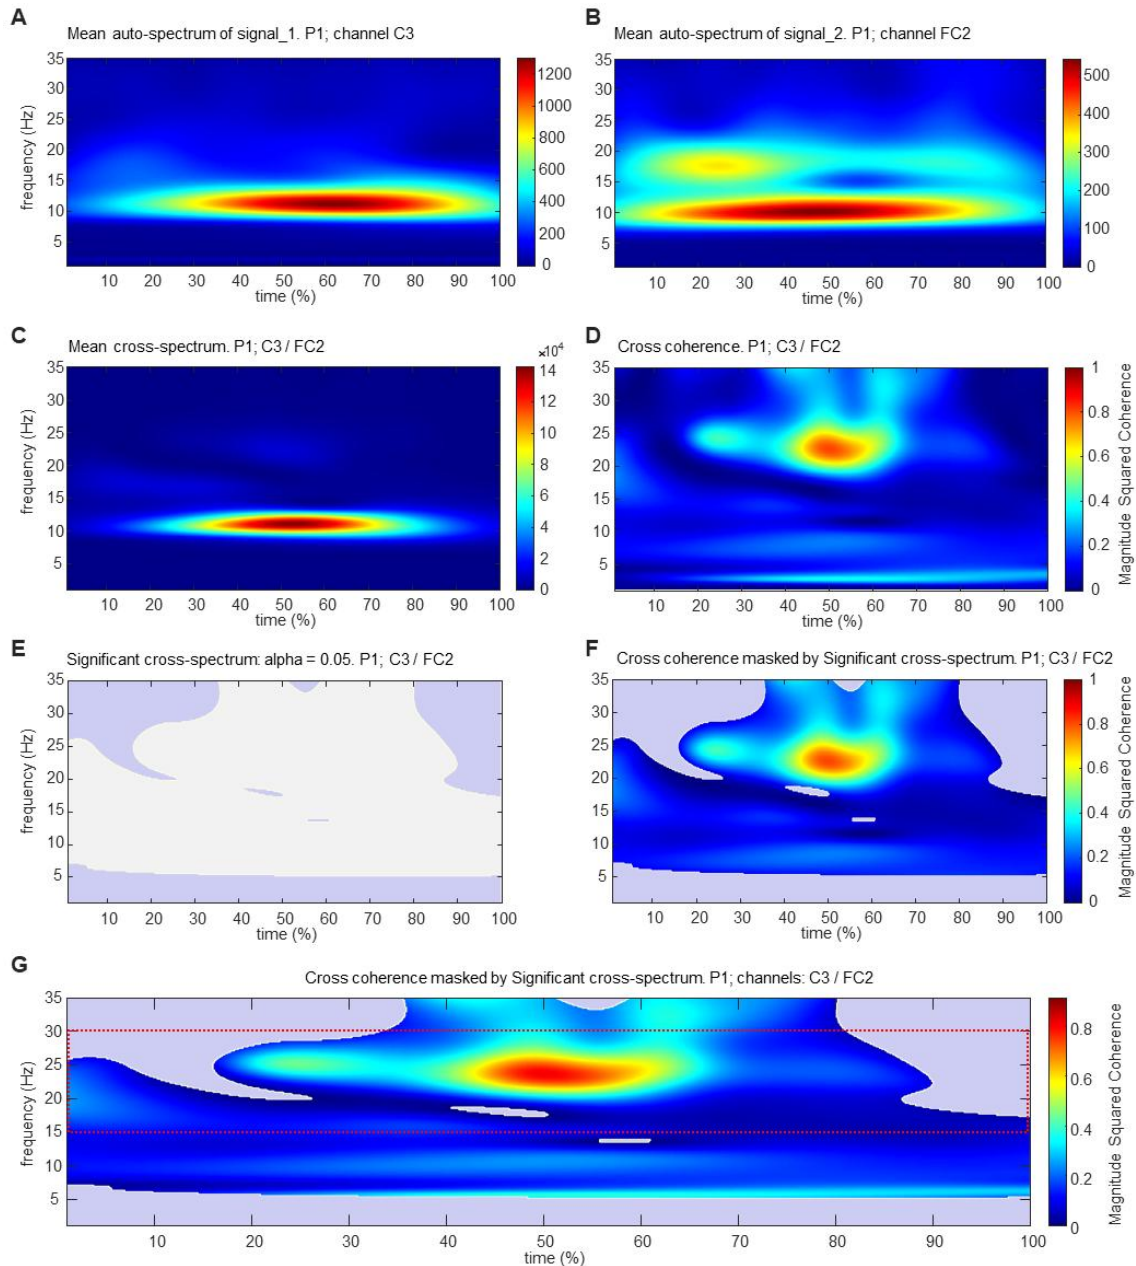

**Figure S1.** Summary for Cortical Functional Coherence (CFC) compute procedure. (A) Compute 'Mean Auto-Spectrum' from the 'Wavelet Scalogram' of  $n$  repetitions for signal 1 (e.g. C3 EEG-channel). (B) Compute 'Mean Auto-Spectrum' from the 'Wavelet Scalogram' of  $n$  repetitions for signal 2 (e.g. FC2 EEG-channel). (C) Compute 'Mean Cross-Spectrum' from the 'Cross-Spectrums' from each signals pair. (D) Compute 'Magnitude-Squared Coherence'. (E) Determine 'Significant Cross-Spectrum'. (F) Use 'Significant Cross-Spectrum' as a mask over 'Magnitude-Squared Coherence' (G) Coherence masked with color scale adjusted. The dashed rectangle in red correspond to the window of interest to compute CFC values within beta-band (15 to 30 Hz).

**Table S1** Planning times in milliseconds, expressed as mean  $\pm$  standard deviation for each participant

| Participants  | Planning times (ms)      |                       |
|---------------|--------------------------|-----------------------|
|               | Left hand (non-dominant) | Right hand (dominant) |
| P1            | 255 $\pm$ 128            | 322 $\pm$ 123         |
| P2            | 209 $\pm$ 87             | 225 $\pm$ 95          |
| P4            | 182 $\pm$ 86             | 245 $\pm$ 45          |
| P5            | 193 $\pm$ 88             | 238 $\pm$ 91          |
| P6            | 284 $\pm$ 139            | 347 $\pm$ 72          |
| P8            | 174 $\pm$ 112            | 277 $\pm$ 97          |
| P9            | 266 $\pm$ 109            | 267 $\pm$ 98          |
| P10           | 228 $\pm$ 112            | 211 $\pm$ 94          |
| P11           | 162 $\pm$ 90             | 238 $\pm$ 114         |
| P13           | 271 $\pm$ 111            | 334 $\pm$ 61          |
| P14           | 286 $\pm$ 141            | 316 $\pm$ 151         |
| P15           | 248 $\pm$ 146            | 286 $\pm$ 140         |
| P16           | 266 $\pm$ 129            | 306 $\pm$ 68          |
| P17           | 242 $\pm$ 104            | 243 $\pm$ 70          |
| P18           | 247 $\pm$ 89             | 258 $\pm$ 78          |
| P19           | 235 $\pm$ 127            | 255 $\pm$ 121         |
| Group Average | 234 $\pm$ 39             | 273 $\pm$ 41          |

**Table S2** Gamma GLM for planning time comparison

| Fixed effect                  | Estimate | SE    | t-stat | p-value | 95% CI         |
|-------------------------------|----------|-------|--------|---------|----------------|
| Intercept (non-dominant hand) | 5.456    | 0.039 | 140.85 | <0.001  | [5.377, 5.536] |
| Dominant hand                 | 0.153    | 0.055 | 2.794  | 0.009   | [0.041, 0.265] |

Model fitted with Gamma distribution and log link function.

Note: The exponentiated coefficient for HandDominant ( $\exp(0.153) = 1.166$ ) indicates that dominant-hand planning time is 16.6% longer than non-dominant-hand planning time.

**Table S3** Gamma GLM for planning time prediction (dominant hand): Additive model

| Fixed effect | Estimate | SE     | t-stat  | p-value | 95% CI           |
|--------------|----------|--------|---------|---------|------------------|
| Intercept    | 5.2755   | 0.0953 | 55.38   | <0.001  | [5.085, 5.466]   |
| GE           | -4.8328  | 2.6914 | -1.7957 | 0.096   | [-10.215, 0.550] |
| MC           | 7.8877   | 2.9031 | 2.717   | 0.018   | [2.081, 13.694]  |

Model:  $\log(\text{PT}) \sim 1 + \text{GE} + \text{MC}$ , Distribution: Gamma, Link: Log, Observations: 16

Overall model fit:  $F(2, 13) = 9.70$ ,  $p = 0.00265$ ; Estimated Dispersion: 0.0104

Note: GE = Global Efficiency, MC = Mean Clustering, PT = Planning time

**Table S4** Gamma GLM for planning time prediction (dominant hand): Interaction model

| Fixed effect   | Estimate | SE     | t-stat  | p-value | 95% CI            |
|----------------|----------|--------|---------|---------|-------------------|
| Intercept      | 5.1773   | 0.3677 | 14.08   | <0.001  | [4.442, 5.913]    |
| GE             | -4.3994  | 3.1812 | -1.3829 | 0.192   | [-10.762, 1.963]  |
| MC             | 9.1692   | 5.5421 | 1.6545  | 0.124   | [-2.915, 21.253]  |
| GE $\times$ MC | -6.6074  | 23.892 | -0.2766 | 0.787   | [-54.391, 41.176] |

Model:  $\log(\text{PT}) \sim 1 + \text{GE} + \text{MC} + \text{GE} \times \text{MC}$ , Distribution: Gamma, Link: Log, Observations: 16

Overall model fit:  $F(3, 12) = 6.07$ ,  $p = 0.00936$ ; Estimated Dispersion: 0.0111

Note: GE = Global Efficiency, MC = Mean Clustering, PT = Planning time
